# Supplementary material for: Genome and Transcriptome Analyses Provide Insight into the Euryhaline Adaptation Mechanism of Crassostrea gigas
Source: PLoS One. 2013 Mar 12;8(3):e58563. doi: 10.1371/journal.pone.0058563 (PMC3595286; doi:10.1371/journal.pone.0058563)
Supplement: Table S1 — Genome Data resources used in global metabolic pathways (iPath) analysis. (XLSX) [file pone.0058563.s004.xlsx]

## Sheet: Sheet1
Table S1 Genome Data resources used in global metabolic pathways (iPath) analysis
Species Name	Source	Classification	File Name / Version	No. genes
Lottia gigantea	JGI	Intertidal animals	v1.0	23764
Capitella.teleta	JGI	Intertidal animals	v1.0	32363
Helobdella robusta	JGI	Stenohaline terrestrial animals	v1.0	23358
Drosophila melanogaster	Flybase	Stenohaline terrestrial animals	r5.27	13689
Homo sapiens	ENSEMBL	Stenohaline terrestrial animals	Homo sapiens.GRCh37.56	22389
Apis mellifera	OGS	Stenohaline terrestrial animals	v2.0	11063
Crassostrea gigas	NCBI	Intertidal animals	v1.0	28027
Strongylocentrotus purpuratus	SpBase	Intertidal animals	SPU_peptide sequence	29122
