# Supplementary material for: Genome and Transcriptome Analyses Provide Insight into the Euryhaline Adaptation Mechanism of Crassostrea gigas
Source: PLoS One. 2013 Mar 12;8(3):e58563. doi: 10.1371/journal.pone.0058563 (PMC3595286; doi:10.1371/journal.pone.0058563)
Supplement: Table S3 — Marker genes for the various salinities treatments. (XLSX) [file pone.0058563.s006.xlsx]

## Sheet: Sheet1
TableS3. Marker genes in various salinities treatments
Salt5	Salt10 and 15	Salt20 and 25	Salt40
CGI_10025970	CGI_10002660	CGI_10028217	CGI_10012672
CGI_10023577	CGI_10024054	CGI_10013269	CGI_10023514
CGI_10002147	CGI_10006814	CGI_10003049	CGI_10007190
CGI_10026884	CGI_10024452	CGI_10021348	CGI_10008792
CGI_10024612	CGI_10005440	CGI_10026040	CGI_10025641
CGI_10008350	CGI_10017733	CGI_10017666	CGI_10025049
CGI_10023136	CGI_10014944	CGI_10025939	CGI_10007599
CGI_10013579	CGI_10000769	CGI_10003690	CGI_10027008
CGI_10025458	CGI_10020759	CGI_10013038	CGI_10015834
CGI_10024870	CGI_10024456	CGI_10009306	CGI_10017120
CGI_10014754	CGI_10022516	CGI_10003001	CGI_10010874
CGI_10007023	CGI_10009604	CGI_10014062	CGI_10018713
CGI_10018535	CGI_10017609	CGI_10011719	CGI_10021673
CGI_10001299	CGI_10004578	CGI_10024647	CGI_10026651
CGI_10014625	CGI_10007585	CGI_10015931	CGI_10020163
CGI_10016893	CGI_10012319	CGI_10027666	CGI_10007537
CGI_10000155	CGI_10001983	CGI_10016788	CGI_10028373
CGI_10025296	CGI_10004065	CGI_10021460	CGI_10028152
CGI_10000238	CGI_10001455	CGI_10009901	CGI_10015330
CGI_10000105	CGI_10004664	CGI_10017777	CGI_10012767
CGI_10020533	CGI_10005981	CGI_10012447	CGI_10008033
CGI_10010663	CGI_10009947	CGI_10028417	CGI_10008345
CGI_10008601	CGI_10008379	CGI_10004510	CGI_10011361
CGI_10014218	CGI_10019729	CGI_10005921	CGI_10027067
CGI_10009397	CGI_10023469	CGI_10026755	CGI_10003350
CGI_10023049	CGI_10017020	CGI_10000758	CGI_10015044
CGI_10005279	CGI_10023958	CGI_10005153	CGI_10018915
CGI_10027943	CGI_10001601	CGI_10002815	CGI_10012770
CGI_10007286	CGI_10016489	CGI_10005232	CGI_10017848
CGI_10004200	CGI_10004780	CGI_10002763	CGI_10001560
CGI_10012163	CGI_10001881	CGI_10025947	CGI_10001515
CGI_10023400	CGI_10002722	CGI_10001429	CGI_10002045
CGI_10000513	CGI_10028155	CGI_10000017	CGI_10027684
CGI_10022412	CGI_10017841	CGI_10003734	CGI_10022826
CGI_10007301	CGI_10024958	CGI_10016546	CGI_10012380
CGI_10001016	CGI_10009491	CGI_10015939	CGI_10020703
CGI_10018651	CGI_10019943	CGI_10026604	CGI_10011065
CGI_10017548	CGI_10014745	CGI_10007687	CGI_10024453
CGI_10025754	CGI_10011924	CGI_10016379	CGI_10012598
CGI_10009284	CGI_10011226	CGI_10003215	CGI_10021846
CGI_10015660	CGI_10026937	CGI_10002306	CGI_10010197
CGI_10000942	CGI_10011828	CGI_10024139	CGI_10027554
CGI_10010614	CGI_10010466	CGI_10027258	CGI_10003185
CGI_10015265	CGI_10015526	CGI_10020068	CGI_10025582
CGI_10014620	CGI_10010900	CGI_10015034	CGI_10017346
CGI_10000152	CGI_10003323	CGI_10016827	CGI_10008748
CGI_10018847	CGI_10009309	CGI_10015133	CGI_10017853
CGI_10000207	CGI_10012046	CGI_10018011	CGI_10006838
CGI_10006950	CGI_10005587	CGI_10014048	CGI_10016809
CGI_10017687	CGI_10015909	CGI_10004691	CGI_10021776
CGI_10017682	CGI_10009670	CGI_10001355	CGI_10000342
CGI_10009987	CGI_10025038	CGI_10013853	CGI_10018138
CGI_10028463	CGI_10019903	CGI_10028700	CGI_10004633
CGI_10025381	CGI_10028190	CGI_10019956	CGI_10003637
CGI_10007725	CGI_10002380	CGI_10019521	CGI_10005953
CGI_10014616	CGI_10016764	CGI_10027112	CGI_10004710
CGI_10017315	CGI_10018684	CGI_10017667	CGI_10005684
CGI_10000254	CGI_10006453	CGI_10000538	CGI_10025554
CGI_10010654	CGI_10027872	CGI_10017377	CGI_10020222
CGI_10018018	CGI_10019192	CGI_10020659	CGI_10024417
CGI_10017681	CGI_10012722	CGI_10007598	CGI_10021493
CGI_10023223	CGI_10016962	CGI_10009007	CGI_10010099
CGI_10002284	CGI_10024789	CGI_10011490	CGI_10005529
CGI_10013462	CGI_10022592	CGI_10023945	CGI_10018114
CGI_10027245	CGI_10016393	CGI_10008310	CGI_10010590
CGI_10014389	CGI_10005108	CGI_10015647	CGI_10023202
CGI_10001157	CGI_10004776	CGI_10002102	CGI_10021584
CGI_10006839	CGI_10022117	CGI_10007797	CGI_10015791
CGI_10001027	CGI_10017787	CGI_10002634	CGI_10019981
CGI_10001076	CGI_10014170	CGI_10026929	CGI_10002314
CGI_10005512	CGI_10012593	CGI_10005558	CGI_10021060
CGI_10003692	CGI_10022877	CGI_10024763	CGI_10020705
CGI_10000276	CGI_10021160	CGI_10003705	CGI_10003630
CGI_10000239	CGI_10008534	CGI_10006052	CGI_10023867
CGI_10000137	CGI_10007470	CGI_10016739	CGI_10005995
CGI_10018393	CGI_10018015	CGI_10006081	CGI_10016900
CGI_10015944	CGI_10020387	CGI_10014608	CGI_10020100
CGI_10013273	CGI_10014440	CGI_10014858	CGI_10019209
CGI_10002570	CGI_10000698	CGI_10022216	CGI_10021847
CGI_10010838	CGI_10011165	CGI_10019778	CGI_10021061
CGI_10000104	CGI_10011725	CGI_10007453
CGI_10015264	CGI_10021063	CGI_10026633
CGI_10000514	CGI_10021278	CGI_10000780
CGI_10000204	CGI_10007411	CGI_10007967
CGI_10024238	CGI_10018432	CGI_10025084
CGI_10022241	CGI_10015367	CGI_10012132
CGI_10014779	CGI_10015015	CGI_10006106
CGI_10008744	CGI_10023542	CGI_10024764
CGI_10024220	CGI_10015827	CGI_10022916
CGI_10002816	CGI_10023790	CGI_10003057
CGI_10000915	CGI_10003583	CGI_10015609
CGI_10002788	CGI_10017367	CGI_10005499
CGI_10000079	CGI_10024976	CGI_10006388
CGI_10002304	CGI_10010889	CGI_10015338
CGI_10000702	CGI_10003908	CGI_10014358
CGI_10001288	CGI_10020900	CGI_10018471
CGI_10000042	CGI_10018356	CGI_10000519
CGI_10017684	CGI_10010566	CGI_10019504
CGI_10000154	CGI_10026560	CGI_10011245
CGI_10000368	CGI_10026423	CGI_10028430
CGI_10004166	CGI_10018037	CGI_10000596
CGI_10000143	CGI_10024560	CGI_10005950
CGI_10000518	CGI_10005758	CGI_10010495
CGI_10021426	CGI_10028359	CGI_10024096
CGI_10009283	CGI_10011040	CGI_10003555
CGI_10024219	CGI_10026674	CGI_10007668
CGI_10006341	CGI_10023470	CGI_10013285
CGI_10025412	CGI_10006962	CGI_10003465
CGI_10002950	CGI_10022641	CGI_10009473
CGI_10014906	CGI_10014138	CGI_10011790
CGI_10011657	CGI_10006829	CGI_10019437
CGI_10013277	CGI_10017978	CGI_10006402
CGI_10015266	CGI_10004002	CGI_10010939
CGI_10002673	CGI_10011228	CGI_10017091
CGI_10016729	CGI_10022794	CGI_10021988
CGI_10023899	CGI_10013020	CGI_10017831
CGI_10012994	CGI_10003472	CGI_10011033
CGI_10002356	CGI_10021769	CGI_10012055
CGI_10000517	CGI_10003163	CGI_10006650
CGI_10025411	CGI_10018414	CGI_10018543
CGI_10013511	CGI_10009959	CGI_10008191
CGI_10025973	CGI_10021800	CGI_10021629
CGI_10000014	CGI_10028918	CGI_10002793
CGI_10018637	CGI_10015556	CGI_10024325
CGI_10028404	CGI_10015801	CGI_10004331
CGI_10023609	CGI_10006683	CGI_10005116
CGI_10006885	CGI_10024190	CGI_10000930
CGI_10000118	CGI_10022504	CGI_10005831
CGI_10015382	CGI_10005872	CGI_10022418
CGI_10019883	CGI_10019682	CGI_10028312
CGI_10000253	CGI_10023993	CGI_10018641
CGI_10008045	CGI_10020743	CGI_10017240
CGI_10000048	CGI_10019694	CGI_10018409
CGI_10000205	CGI_10010892	CGI_10002026
CGI_10016445	CGI_10024034	CGI_10017313
CGI_10000119	CGI_10003710	CGI_10007235
CGI_10020830	CGI_10005191	CGI_10023944
CGI_10005096	CGI_10003627	CGI_10012821
CGI_10020251	CGI_10009766	CGI_10017422
CGI_10003421	CGI_10005291	CGI_10027798
CGI_10011124	CGI_10005510	CGI_10011365
CGI_10000150	CGI_10014728	CGI_10024927
CGI_10013476	CGI_10023447	CGI_10015708
CGI_10026378	CGI_10001213	CGI_10006581
CGI_10003362	CGI_10009868	CGI_10008455
CGI_10016889	CGI_10018187	CGI_10021191
CGI_10016423	CGI_10008646	CGI_10010775
CGI_10000208	CGI_10022918	CGI_10003177
CGI_10000516	CGI_10011045	CGI_10018733
CGI_10001499	CGI_10014828	CGI_10010183
CGI_10000142	CGI_10010241	CGI_10007371
CGI_10011526	CGI_10007405	CGI_10004041
CGI_10028176	CGI_10018395	CGI_10016394
CGI_10010213	CGI_10004960	CGI_10015407
CGI_10017680	CGI_10009361	CGI_10002539
CGI_10004192	CGI_10004423	CGI_10024130
CGI_10017765	CGI_10020666	CGI_10028270
CGI_10006648	CGI_10027523	CGI_10010949
CGI_10014213	CGI_10011461	CGI_10006756
CGI_10017912	CGI_10001058	CGI_10004145
CGI_10021715	CGI_10013275	CGI_10026931
CGI_10000151	CGI_10017584	CGI_10000127
CGI_10001426	CGI_10012106	CGI_10012969
CGI_10009257	CGI_10014636	CGI_10000655
CGI_10016573	CGI_10004251	CGI_10018832
CGI_10004164	CGI_10002665	CGI_10011454
CGI_10017685	CGI_10021536	CGI_10017664
CGI_10000068	CGI_10002389	CGI_10008178
CGI_10000203	CGI_10028054	CGI_10004603
CGI_10010662	CGI_10005783	CGI_10017896
CGI_10005393	CGI_10019568	CGI_10011506
CGI_10020195	CGI_10019205	CGI_10028487
CGI_10011020	CGI_10026822	CGI_10001155
CGI_10001630	CGI_10003780	CGI_10020694
CGI_10016415	CGI_10006102	CGI_10027211
CGI_10023222	CGI_10021902	CGI_10006083
CGI_10009795	CGI_10027985	CGI_10010223
CGI_10000009	CGI_10017349	CGI_10010252
CGI_10000103	CGI_10017876	CGI_10026217
CGI_10004214	CGI_10008793	CGI_10016027
CGI_10000010	CGI_10007832	CGI_10001070
CGI_10017069	CGI_10009098	CGI_10023840
CGI_10000805	CGI_10011001	CGI_10017272
CGI_10008916	CGI_10014486	CGI_10022839
CGI_10017686	CGI_10017382	CGI_10021935
CGI_10015698	CGI_10018514	CGI_10012068
CGI_10000515	CGI_10001514	CGI_10013554
CGI_10005392	CGI_10019675	CGI_10002778
CGI_10011376	CGI_10022836	CGI_10017551
	CGI_10008685	CGI_10016740
	CGI_10012306	CGI_10002343
	CGI_10004991	CGI_10016194
	CGI_10008192	CGI_10014691
	CGI_10026847	CGI_10018912
	CGI_10025102	CGI_10015362
	CGI_10025990	CGI_10013862
	CGI_10005803	CGI_10012678
	CGI_10024565	CGI_10013390
	CGI_10016156	CGI_10011225
	CGI_10014842	CGI_10004230
	CGI_10014860	CGI_10010354
	CGI_10023732	CGI_10003337
	CGI_10027653	CGI_10012948
	CGI_10016113	CGI_10018365
	CGI_10018833	CGI_10023197
	CGI_10012102	CGI_10014893
	CGI_10019825	CGI_10009578
	CGI_10003431
	CGI_10014277
	CGI_10010063
	CGI_10014301
	CGI_10026905
	CGI_10003661
	CGI_10011891
	CGI_10016186
	CGI_10025088
	CGI_10000636
	CGI_10002416
	CGI_10013723
	CGI_10027737
	CGI_10017036
	CGI_10021621
	CGI_10024617
	CGI_10006137
	CGI_10012828
	CGI_10025183
	CGI_10027601
	CGI_10015544
	CGI_10026907
	CGI_10021688
	CGI_10012786
	CGI_10000914
	CGI_10024446
	CGI_10012546
	CGI_10007420
	CGI_10028419
	CGI_10028552
	CGI_10022545
	CGI_10004092
	CGI_10010762
	CGI_10005951
	CGI_10011854
	CGI_10000420
	CGI_10011578
	CGI_10027987
	CGI_10007856
	CGI_10016420
	CGI_10021613
	CGI_10014087
	CGI_10012991
	CGI_10011247
	CGI_10007901
	CGI_10020600
	CGI_10001178
	CGI_10020591
	CGI_10022269
	CGI_10023769
	CGI_10005657
	CGI_10001343
	CGI_10004130
	CGI_10010114
	CGI_10005415
	CGI_10017317
	CGI_10010294
	CGI_10001362
	CGI_10017314
	CGI_10006691
	CGI_10020979
	CGI_10026640
	CGI_10004796
	CGI_10025511
	CGI_10027576
	CGI_10015923
	CGI_10023554
	CGI_10009408
	CGI_10018824
	CGI_10018725
	CGI_10001791
	CGI_10023318
	CGI_10012771
	CGI_10020508
	CGI_10005056
	CGI_10001849
	CGI_10024542
	CGI_10003411
	CGI_10012957
	CGI_10019198
	CGI_10016913
	CGI_10018846
	CGI_10014593
	CGI_10005791
	CGI_10026148
	CGI_10028360
	CGI_10005227
	CGI_10014266
	CGI_10010658
	CGI_10009581
	CGI_10024808
	CGI_10012592
	CGI_10009569
	CGI_10006351
	CGI_10019051
	CGI_10005616
	CGI_10022753
	CGI_10026544
	CGI_10021656
	CGI_10005702
	CGI_10006928
	CGI_10018280
	CGI_10012001
	CGI_10011215
	CGI_10010592
	CGI_10025834
	CGI_10022005
	CGI_10028602
	CGI_10026192
	CGI_10022708
	CGI_10011387
	CGI_10008978
	CGI_10022204
	CGI_10017877
	CGI_10002928
	CGI_10024316
	CGI_10007334
	CGI_10024606
	CGI_10002011
	CGI_10006512
	CGI_10020955
	CGI_10023452
	CGI_10006546
	CGI_10026105
	CGI_10027563
	CGI_10002558
	CGI_10007644
	CGI_10027366
	CGI_10017170
	CGI_10026419
	CGI_10023731
	CGI_10013591
	CGI_10001841
	CGI_10021201
	CGI_10021192
	CGI_10001861
	CGI_10002657
	CGI_10013274
	CGI_10014131
	CGI_10000169
	CGI_10005163
	CGI_10017325
	CGI_10005150
	CGI_10018577
	CGI_10014140
	CGI_10001366
	CGI_10017948
	CGI_10021360
	CGI_10008175
	CGI_10007199
	CGI_10000445
	CGI_10005001
	CGI_10018035
	CGI_10008428
	CGI_10009995
	CGI_10013361
	CGI_10007554
	CGI_10018198
	CGI_10027499
	CGI_10008174
	CGI_10006103
	CGI_10011447
	CGI_10009351
	CGI_10010579
	CGI_10028728
	CGI_10006823
	CGI_10024095
	CGI_10019816
	CGI_10027072
	CGI_10020742
	CGI_10007437
	CGI_10025149
	CGI_10002608
	CGI_10015821
	CGI_10015897
	CGI_10004562
	CGI_10027599
	CGI_10002607
	CGI_10011243
	CGI_10025980
	CGI_10006040
	CGI_10009422
	CGI_10006507
	CGI_10019082
	CGI_10025094
	CGI_10024038
	CGI_10007647
	CGI_10028317
	CGI_10011043
	CGI_10002610
	CGI_10028662
	CGI_10023707
	CGI_10017360
	CGI_10028203
	CGI_10004484
	CGI_10021504
	CGI_10018747
	CGI_10027911
	CGI_10018314
	CGI_10002775
	CGI_10006869
	CGI_10020723
	CGI_10027768
	CGI_10023917
	CGI_10022357
	CGI_10009981
	CGI_10002800
	CGI_10004001
	CGI_10015368
	CGI_10005582
	CGI_10024053
	CGI_10006717
	CGI_10013769
	CGI_10008359
	CGI_10011022
	CGI_10026795
	CGI_10009789
	CGI_10001701
	CGI_10003167
	CGI_10012409
	CGI_10003233
	CGI_10008909
	CGI_10023436
	CGI_10019359
	CGI_10017108
	CGI_10010596
	CGI_10023975
	CGI_10019485
	CGI_10017084
	CGI_10027333
	CGI_10003934
	CGI_10026457
	CGI_10027395
	CGI_10004425
	CGI_10025795
	CGI_10028374
	CGI_10022972
	CGI_10004580
	CGI_10008723
	CGI_10010160
	CGI_10021733
	CGI_10022547
	CGI_10024232
	CGI_10008873
	CGI_10017080
	CGI_10000854
	CGI_10026933
	CGI_10019019
	CGI_10024183
	CGI_10001437
	CGI_10024237
	CGI_10025982
	CGI_10004421
	CGI_10007484
	CGI_10006365
	CGI_10021591
	CGI_10013859
	CGI_10012895
	CGI_10012725
	CGI_10027820
	CGI_10014116
	CGI_10022147
	CGI_10014448
	CGI_10027111
	CGI_10001814
	CGI_10006929
	CGI_10022903
	CGI_10001816
	CGI_10021982
	CGI_10004252
	CGI_10003430
	CGI_10009944
	CGI_10001842
