# Supplementary material for: Genome and Transcriptome Analyses Provide Insight into the Euryhaline Adaptation Mechanism of Crassostrea gigas
Source: PLoS One. 2013 Mar 12;8(3):e58563. doi: 10.1371/journal.pone.0058563 (PMC3595286; doi:10.1371/journal.pone.0058563)
Supplement: Table S7 — Expanded maps between different species. (XLSX) [file pone.0058563.s010.xlsx]

## Sheet: Sheet2
TableS7. Expanded Maps between different species.
Map	Map ID	Different Species						Map Name
		Oyster Gene Count	※The other species Gene Count	P-values	※Aquatic intertidal species Gene Count	※Terrestrial speices Gene Count	P-value
Carbohydrate Metabolism	map00010				82.5	55.5	0.001204	Glycolysis / Gluconeogenesis
	map00030				39	26	0.003583	Pentose phosphate pathway
	map00040	36	23	0.008443	31.75	15.25	0.002308	Pentose and glucuronate interconversions
	map00051				55.75	35.25	0.02121	Fructose and mannose metabolism
	map00053				25.5	11.25	0.02635	Ascorbate and aldarate metabolism
	map00520	124	81	8e-06	97.5	58	0.03257	Amino sugar and nucleotide sugar metabolism
	map00620	93	69	0.004722	85.75	50	0.01072	Pyruvate metabolism
Lipid Metabolism	map00061				32.75	12.25	0.00127	Fatty acid biosynthesis
	map00062	22	12	0.006228	18.75	6.5	0.000872	Fatty acid elongation in mitochondria
	map00071	84	66	0.024005	88.25	42	0.007761	Fatty acid metabolism
	map00072	20	11	0.010219	15.5	6.75	0.01686	Synthesis and degradation of ketone bodies
	map00100				29.25	14.5	0.01682	Steroid biosynthesis
	map00120				11.5	5.5	0.04509	Primary bile acid biosynthesis
	map00140	50	38	0.048343	56	22	0.01287	Steroid hormone biosynthesis
	map00230				304.25	193.25	0.04355	Purine metabolism
	map00590	115	77	4.8e-05	114	37.5	0.01221	Arachidonic acid metabolism
	map00591	63	44	0.005785	60	29.75	0.04407	Linoleic acid metabolism
	map00592				32.75	15	0.006211	alpha-Linolenic acid metabolism
	map00600				49.75	32.75	0.03088	Sphingolipid metabolism
	map01040				40	16.5	0.02301	Biosynthesis of unsaturated fatty acids
Amino Acid Metabolism	map00260	93	60	6.3e-05	84.75	36.75	0.03229	Glycine, serine and threonine metabolism
	map00270	59	43	0.016251	57.75	27.5	0.01503	Cysteine and methionine metabolism
	map00280				78.5	37.75	0.00408	Valine, leucine and isoleucine degradation
	map00300				9.5	2.75	0.03278	Lysine biosynthesis
	map00310	22	8	7.7e-05	84.75	45	0.01178	Lysine degradation
	map00312	16	4	3.2e-05				beta-Lactam resistance
	map00330	100	73	0.002325	98	47.75	0.02568	Arginine and proline metabolism
	map00340	62	48	0.040006	65	27.25	0.004137	Histidine metabolism
	map00350	118	80	6.6e-05	107.5	48	0.0006331	Tyrosine metabolism
	map00380	96	69	0.001736	99.25	35.25	0.00146	Tryptophan metabolism
	map00410	51	34	0.005357	45	22.25	0.009165	beta-Alanine metabolism
	map00430				20.5	11	0.007338	Taurine and hypotaurine metabolism
	map00450				27.5	13	0.01832	Selenoamino acid metabolism
	map00460				27	10.25	0.01062	Cyanoamino acid metabolism
Xenobiotics Biodegradation and Metabolism	map00361				5	0.25	0.0278	Chlorocyclohexane and chlorobenzene degradation
	map00362	50	34	0.007034	52	16.75	0.006618	Benzoate degradation
	map00621				2.5	0.25	0.03278	Dioxin degradation
	map00623	5	2	0.034877				Toluene degradation
	map00627	90	71	0.025261				Aminobenzoate degradation
	map00980	75	55	0.007419	77.5	36.5	0.03846	Metabolism of xenobiotics by cytochrome P450
Glycan Biosynthesis and Metabolism	map00510	80	64	0.041725	80.75	45.5	0.01422	N-Glycan biosynthesis
	map00511	53	38	0.016886				Other glycan degradation
	map00512				39.25	19	0.02796	Mucin type O-Glycan biosynthesis
	map00513	81	63	0.024753				Various types of N-glycan biosynthesis
	map00514				32.75	20.75	0.02592	Other types of O-glycan biosynthesis
	map00531				71.75	18	0.03843	Glycosaminoglycan degradation
	map00601	56	40	0.01274	64.75	13.75	0.01233	Glycosphingolipid biosynthesis - lacto and neolacto series
	map00603	41	27	0.008538				Glycosphingolipid biosynthesis - globo series
	map00604	20	9	0.001653				Glycosphingolipid biosynthesis - ganglio series
Genetic Information Processing	map03008	101	54	0				Ribosome biogenesis in eukaryotes
	map03018	220	140	0	175.5	98.75	0.03756	RNA degradation
	map03030	64	50	0.044181	61.75	36.5	0.007459	DNA replication
	map03420				79.75	46.25	0.01715	Nucleotide excision repair
	map03430	51	35	0.007856	45.75	22.75	0.002801	Mismatch repair
	map03440	59	45	0.033965	58.5	30.5	0.01249	Homologous recombination
	map03450				25.5	11.5	0.009238	Non-homologous end-joining
	map04122				27.25	12	0.03323	Sulfur relay system
	map04130				31	21.75	0.04882	SNARE interactions in vesicular transport
	map04141				241.25	154.5	0.03761	Protein processing in endoplasmic reticulum
Environmental Information Processing	map04060	59	30	5e-06				Cytokine-cytokine receptor interaction
	map04070				151.5	97.25	0.02464	Phosphatidylinositol signaling system
	map04080	530	247	0	714.25	155.75	0.03916	Neuroactive ligand-receptor interaction
	map04350				94.5	58.25	0.01007	TGF-beta signaling pathway
	map04512	350	222	0	295	122.75	0.01713	ECM-receptor interaction
	map04514				129	60.75	0.004315	Cell adhesion molecules (CAMs)
	map02010	80	63	0.029167	93.25	35.75	0.0272	ABC transporters
	map02020	53	30	0.000158	45.75	15.25	0.01015	Two-component system
	map04330	149	111	0.000472				Notch signaling pathway
Organismal Systems	map04320	131	89	2.5e-05				Dorso-ventral axis formation
	map04745	125	81	6e-06	100	55.5	0.0136	Phototransduction - fly
	map04912	159	119	0.000364	141.5	82.75	0.04582	GnRH signaling pathway
	map04916	152	114	0.000561				Melanogenesis
	map04975	73	46	0.000246				Fat digestion and absorption
	map04977	67	24	0				Vitamin digestion and absorption
	map03320	98	80	0.040193	98.75	56.5	0.004931	PPAR signaling pathway
Organismal Systems-Immune System	map04610	215	90	0	154.5	23.25	0.009996	Complement and coagulation cascades
	map04612				59.5	28	0.02317	Antigen processing and presentation
	map04620	135	102	0.001423				Toll-like receptor signaling pathway
	map04621	117	69	0	95	35.75	0.03258	NOD-like receptor signaling pathway
	map04622	71	45	0.000281	61.75	24.75	0.01384	RIG-I-like receptor signaling pathway
	map04623	65	43	0.001484				Cytosolic DNA-sensing pathway
Metabolism of Terpenoids and Polyketides	map00522				1.75	0	0.03535	Biosynthesis of 12-, 14- and 16-membered macrolides
	map00906				1.75	0.25	0.005424	Carotenoid biosynthesis
Metabolism of Cofactors and Vitamins	map00670				27.75	17.25	0.04621	One carbon pool by folate
	map00750				11.5	5.5	0.01843	Vitamin B6 metabolism
	map00785	14	3	3.3e-05				Lipoic acid metabolism
	map00830	65	46	0.006953	62.5	28.75	0.02449	Retinol metabolism
Cellular Processes	map04115				82	38.5	0.00575	p53 signaling pathway
	map04120	265	215	0.000689	280.75	141.75	0.02075	Ubiquitin mediated proteolysis
	map04142	216	189	0.044401	257.5	118.5	0.01289	Lysosome
	map04144	246	212	0.018358				Endocytosis
	map04145	369	254	0	373	120.75	0.001487	Phagosome
	map04146				140	78.25	0.007256	Peroxisome
	map04210	143	85	0	109	50.25	0.007416	Apoptosis
	map04510	592	402	0	504.75	251.25	0.01906	Focal adhesion
	map04520	135	108	0.009118	132.25	77	0.04103	Adherens junction
※ The other animals included: Capitella capitata, Lottia gigantean, Strongylocentrotus purpuratus, Helobdella robusta, Drosophila melanogaster, Apis mellifera, Homo sapiens
Aquatic intertidal species inlcuded: Capitella capitata, Lottia gigantean, Strongylocentrotus purpuratus, Helobdella robusta, C. gigas
Terrestrial species included: Drosophila melanogaster, Apis mellifera, Homo sapiens
